# Supplementary material for: The Potato Yam Phyllosphere Ectosymbiont Paraburkholderia sp. Msb3 Is a Potent Growth Promotor in Tomato
Source: Front Microbiol. 2020 Apr 21;11:581. doi: 10.3389/fmicb.2020.00581 (PMC7186400; doi:10.3389/fmicb.2020.00581)
Supplement: Supplementary file 2 [file Table_1.XLSX]

## Sheet: ANIb_Matrix
Table S1 |ANIb matrix from 15 selected genome pairs
#ANIb and aligned percentage	>95	<95
	Paraburkholderia sp. Msb3	Burkholderia sp. Ch1-1	Paraburkholderia xenovorans LB400 [T]	Paraburkholderia phytofirmans PsJN [T]	Paraburkholderia fungorum NBRC 102489 [T]	Paraburkholderia bryophila LMG 23644 [T]	Paraburkholderia insulsa LMG 28183 [T]	Burkholderia sp. ST111	Paraburkholderia kirstenboschensis KB15 [T]	Paraburkholderia rhynchosiae WSM 3937 [T]	Paraburkholderia aspalathi LMG 27731 [T]	Paraburkholderia sediminicola LMG 24238 [T]	Paraburkholderia terricola LMG 20594 [T]	Paraburkholderia caledonica NBRC 102488 [T]	Parburkholderia aromaticivorans BN5 [T]
Paraburkholderia sp. Msb3	*	98.89 [87.49]	93.54 [78.62]	87.07 [64.36]	83.57 [57.28]	83.98 [56.44]	83.39 [59.23]	83.98 [57.89]	82.24 [51.56]	82.57 [52.28]	84.15 [59.71]	84.01 [53.52]	84.01 [53.56]	81.92 [52.90]	89.29 [71.24]
Burkholderia sp. Ch1-1	98.59 [84.07]	*	93.33 [76.63]	86.96 [62.42]	83.47 [54.90]	83.91 [53.68]	83.44 [56.57]	84.02 [55.49]	82.21 [49.14]	82.59 [49.73]	83.92 [56.61]	83.85 [52.60]	83.86 [52.60]	81.89 [50.51]	89.17 [70.10]
Paraburkholderia xenovorans LB400 [T]	92.23 [71.01]	92.30 [71.83]	*	85.98 [58.20]	82.75 [52.51]	83.37 [50.50]	82.54 [53.25]	83.26 [51.50]	81.53 [45.69]	81.76 [46.83]	83.05 [53.11]	83.12 [48.90]	83.12 [48.94]	81.30 [47.08]	88.13 [63.57]
Paraburkholderia phytofirmans PsJN [T]	86.85 [65.82]	86.67 [67.17]	86.59 [66.75]	*	83.43 [60.93]	84.09 [60.44]	84.24 [64.47]	84.26 [62.93]	82.35 [54.08]	82.48 [54.77]	84.12 [63.67]	83.84 [56.83]	83.86 [56.86]	81.92 [55.74]	86.76 [68.59]
Paraburkholderia fungorum NBRC 102489 [T]	83.36 [55.39]	83.34 [55.78]	83.23 [56.52]	83.37 [57.86]	*	82.89 [56.35]	97.68 [87.37]	87.01 [62.32]	81.30 [47.95]	81.59 [49.42]	87.08 [64.77]	83.06 [51.44]	83.07 [51.43]	80.96 [49.31]	83.27 [56.81]
Paraburkholderia bryophila LMG 23644 [T]	84.17 [57.87]	84.17 [57.60]	84.25 [57.68]	84.47 [60.43]	83.25 [59.66]	*	83.39 [60.83]	83.78 [61.64]	81.96 [49.90]	82.39 [51.42]	83.72 [62.10]	83.58 [52.77]	83.59 [52.75]	81.70 [52.35]	84.31 [59.49]
Paraburkholderia insulsa LMG 28183 [T]	82.86 [52.46]	82.92 [52.67]	82.66 [52.60]	84.06 [55.63]	97.15 [79.76]	82.65 [52.88]	*	86.54 [59.27]	80.91 [44.92]	81.15 [46.35]	86.75 [60.68]	82.71 [47.87]	82.71 [47.84]	80.60 [46.33]	82.90 [53.95]
Burkholderia sp. ST111	83.31 [56.58]	83.37 [56.60]	83.19 [56.28]	83.74 [60.46]	86.45 [62.85]	82.96 [58.89]	86.44 [65.37]	*	81.33 [49.77]	81.54 [52.52]	93.80 [79.09]	83.54 [54.32]	83.54 [54.29]	80.75 [52.05]	83.53 [59.43]
Paraburkholderia kirstenboschensis KB15 [T]	81.94 [53.94]	81.95 [54.07]	81.92 [53.79]	82.22 [55.67]	81.21 [52.28]	81.68 [51.09]	81.16 [53.57]	81.65 [53.66]	*	85.91 [62.43]	81.66 [54.04]	82.42 [53.37]	82.42 [53.35]	91.28 [72.22]	82.11 [56.93]
Paraburkholderia rhynchosiae WSM 3937 [T]	82.60 [53.69]	82.63 [53.72]	82.55 [53.88]	82.76 [55.09]	81.65 [52.98]	82.24 [51.80]	81.68 [53.65]	82.18 [55.24]	86.25 [61.22]	*	82.10 [57.00]	83.02 [56.76]	83.01 [56.83]	85.42 [61.01]	82.74 [55.96]
Paraburkholderia aspalathi LMG 27731 [T]	83.10 [52.58]	82.99 [52.05]	82.76 [51.98]	83.36 [54.78]	86.24 [58.44]	82.64 [53.13]	86.39 [59.95]	93.41 [71.21]	81.03 [44.62]	81.27 [48.62]	*	83.03 [48.68]	83.05 [48.64]	80.53 [46.49]	83.14 [53.71]
Paraburkholderia sediminicola LMG 24238 [T]	84.61 [58.38]	84.42 [59.71]	84.58 [59.34]	84.60 [61.12]	83.86 [57.89]	84.05 [55.86]	83.87 [58.66]	84.73 [60.02]	83.22 [55.24]	83.56 [59.79]	84.52 [59.79]	*	99.99 [98.36]	82.96 [57.63]	84.83 [60.57]
Paraburkholderia terricola LMG 20594 [T]	84.71 [58.16]	84.56 [59.49]	84.67 [59.16]	84.67 [60.74]	83.92 [57.75]	84.13 [55.62]	83.95 [58.47]	84.80 [59.99]	83.12 [55.38]	83.65 [59.39]	84.58 [59.82]	99.98 [98.23]	*	82.96 [57.79]	84.88 [60.33]
Paraburkholderia caledonica NBRC 102488 [T]	82.09 [58.91]	82.05 [59.43]	82.13 [59.00]	82.33 [61.11]	81.20 [57.38]	81.74 [57.13]	81.33 [58.34]	81.53 [59.45]	92.04 [76.71]	85.44 [66.83]	81.59 [59.58]	82.50 [60.06]	82.49 [60.03]	*	82.16 [62.33]
Parburkholderia aromaticivorans BN5 [T]	89.03 [67.35]	89.01 [68.86]	88.70 [67.05]	86.72 [63.15]	83.27 [55.36]	83.81 [54.74]	83.29 [57.42]	83.78 [57.80]	82.10 [51.39]	82.40 [51.52]	83.71 [58.16]	83.89 [52.61]	83.90 [52.68]	81.74 [52.57]	*

## Sheet: ANIm_Matrix
#ANIm and aligned percentage
	Paraburkholderia sp. Msb3	Burkholderia sp. Ch1-1	Paraburkholderia xenovorans LB400 [T]	Paraburkholderia phytofirmans PsJN [T]	Paraburkholderia fungorum NBRC 102489 [T]	Paraburkholderia bryophila LMG 23644 [T]	Paraburkholderia insulsa LMG 28183 [T]	Burkholderia sp. ST111	Paraburkholderia kirstenboschensis KB15 [T]	Paraburkholderia rhynchosiae WSM 3937 [T]	Paraburkholderia aspalathi LMG 27731 [T]	Paraburkholderia sediminicola LMG 24238 [T]	Paraburkholderia terricola LMG 20594 [T]	Paraburkholderia caledonica NBRC 102488 [T]	Parburkholderia aromaticivorans BN5 [T]
Paraburkholderia sp. Msb3	*	99.59 [87.39]	94.90 [78.37]	89.98 [61.30]	87.53 [49.57]	87.90 [50.29]	87.50 [50.61]	87.79 [51.29]	87.23 [40.84]	87.38 [42.63]	87.86 [52.82]	88.28 [47.49]	88.28 [47.55]	86.80 [40.75]	91.32 [70.04]
Burkholderia sp. Ch1-1	99.59 [83.56]	*	95.04 [75.88]	89.96 [59.14]	87.53 [47.36]	87.87 [47.94]	87.57 [48.50]	87.81 [49.08]	87.23 [39.05]	87.40 [40.96]	87.85 [49.56]	88.30 [46.36]	88.32 [46.41]	86.82 [38.94]	91.44 [68.35]
Paraburkholderia xenovorans LB400 [T]	94.90 [68.58]	95.04 [69.38]	*	89.91 [53.09]	87.57 [43.43]	87.92 [43.71]	87.49 [43.56]	87.81 [44.10]	87.29 [35.29]	87.42 [37.01]	87.80 [44.56]	88.29 [41.69]	88.29 [41.74]	86.85 [35.34]	91.30 [60.61]
Paraburkholderia phytofirmans PsJN [T]	89.98 [62.09]	89.96 [62.96]	89.91 [62.30]	*	87.45 [52.22]	87.95 [53.65]	88.16 [56.01]	87.74 [56.56]	87.20 [43.25]	87.33 [44.59]	87.73 [56.33]	88.16 [50.16]	88.16 [50.17]	86.79 [42.77]	89.84 [64.76]
Paraburkholderia fungorum NBRC 102489 [T]	87.54 [47.33]	87.54 [47.49]	87.57 [47.48]	87.46 [49.24]	*	87.20 [46.60]	98.53 [86.81]	89.53 [60.45]	86.74 [34.48]	86.78 [37.09]	89.51 [62.83]	87.62 [44.06]	87.62 [44.07]	86.35 [34.13]	87.49 [47.59]
Paraburkholderia bryophila LMG 23644 [T]	87.88 [52.12]	87.86 [52.01]	87.91 [52.02]	87.95 [54.79]	87.21 [50.42]	*	87.19 [51.80]	87.32 [53.79]	86.99 [39.34]	87.02 [41.97]	87.35 [53.83]	87.85 [46.48]	87.85 [46.50]	86.55 [39.89]	87.86 [53.54]
Paraburkholderia insulsa LMG 28183 [T]	87.51 [43.81]	87.57 [44.10]	87.49 [43.29]	88.16 [47.76]	98.53 [78.68]	87.19 [43.53]	*	89.47 [56.95]	86.72 [32.12]	86.77 [34.17]	89.47 [58.56]	87.59 [40.54]	87.59 [40.54]	86.33 [31.57]	87.50 [44.65]
Burkholderia sp. ST111	87.79 [48.23]	87.80 [48.32]	87.81 [47.77]	87.73 [52.47]	89.52 [59.51]	87.32 [49.08]	89.46 [61.82]	*	86.74 [37.18]	86.82 [40.10]	95.44 [78.13]	87.91 [47.04]	87.91 [47.06]	86.40 [36.28]	87.75 [50.68]
Paraburkholderia kirstenboschensis KB15 [T]	87.22 [40.46]	87.23 [40.46]	87.29 [40.16]	87.20 [42.34]	86.74 [35.74]	86.98 [37.63]	86.71 [36.70]	86.74 [39.24]	*	89.33 [56.49]	86.76 [39.32]	87.26 [41.63]	87.26 [41.64]	93.37 [69.53]	87.21 [42.20]
Paraburkholderia rhynchosiae WSM 3937 [T]	87.38 [43.92]	87.40 [44.10]	87.42 [44.04]	87.33 [45.43]	86.78 [40.20]	87.03 [41.94]	86.77 [40.77]	86.82 [44.08]	89.34 [58.81]	*	86.96 [44.59]	87.41 [47.42]	87.41 [47.45]	88.50 [55.93]	87.35 [45.68]
Paraburkholderia aspalathi LMG 27731 [T]	87.85 [44.40]	87.84 [43.64]	87.80 [42.93]	87.74 [46.66]	89.51 [55.31]	87.35 [43.83]	89.47 [56.92]	95.44 [69.96]	86.77 [33.31]	86.96 [36.45]	*	87.89 [41.55]	87.89 [41.54]	86.44 [32.28]	87.71 [45.42]
Paraburkholderia sediminicola LMG 24238 [T]	88.28 [53.60]	88.30 [54.26]	88.29 [54.18]	88.16 [55.76]	87.62 [51.97]	87.85 [50.75]	87.59 [52.67]	87.91 [56.49]	87.26 [47.46]	87.41 [51.97]	87.89 [55.51]	*	99.98 [99.89]	86.93 [47.88]	88.25 [55.92]
Paraburkholderia terricola LMG 20594 [T]	88.27 [53.57]	88.31 [54.22]	88.29 [54.17]	88.16 [55.69]	87.62 [51.93]	87.85 [50.73]	87.59 [52.62]	87.90 [56.44]	87.26 [47.45]	87.41 [51.96]	87.90 [55.44]	99.98 [99.89]	*	86.93 [47.87]	88.24 [55.89]
Paraburkholderia caledonica NBRC 102488 [T]	86.80 [45.98]	86.81 [46.05]	86.85 [45.88]	86.79 [47.66]	86.35 [40.47]	86.55 [43.69]	86.33 [41.50]	86.40 [43.66]	93.37 [79.44]	88.50 [61.35]	86.44 [43.54]	86.93 [48.02]	86.93 [48.03]	*	86.85 [47.37]
Parburkholderia aromaticivorans BN5 [T]	91.32 [65.94]	91.44 [67.00]	91.30 [65.17]	89.84 [59.91]	87.49 [46.79]	87.86 [48.64]	87.49 [48.58]	87.76 [50.60]	87.21 [40.10]	87.35 [41.59]	87.71 [50.68]	88.26 [46.68]	88.25 [46.74]	86.85 [39.41]	*

## Sheet: TSC
#Tetra results
	Paraburkholderia sp. Msb3	Burkholderia sp. Ch1-1	Paraburkholderia xenovorans LB400 [T]	Paraburkholderia phytofirmans PsJN [T]	Paraburkholderia fungorum NBRC 102489 [T]	Paraburkholderia bryophila LMG 23644 [T]	Paraburkholderia insulsa LMG 28183 [T]	Burkholderia sp. ST111	Paraburkholderia kirstenboschensis KB15 [T]	Paraburkholderia rhynchosiae WSM 3937 [T]	Paraburkholderia aspalathi LMG 27731 [T]	Paraburkholderia sediminicola LMG 24238 [T]	Paraburkholderia terricola LMG 20594 [T]	Paraburkholderia caledonica NBRC 102488 [T]	Parburkholderia aromaticivorans BN5 [T]
Paraburkholderia sp. Msb3	*	0.9995	0.9976	0.99337	0.9846	0.98389	0.98245	0.98058	0.97692	0.97681	0.97671	0.97646	0.97643	0.9749	0.99501
Burkholderia sp. Ch1-1	0.9995	*	0.99806	0.99345	0.98574	0.98356	0.98382	0.98171	0.9773	0.97788	0.97833	0.97725	0.97722	0.97478	0.99537
Paraburkholderia xenovorans LB400 [T]	0.9976	0.99806	*	0.9911	0.98532	0.97894	0.9841	0.98038	0.97807	0.9792	0.97737	0.97618	0.97618	0.97481	0.99532
Paraburkholderia phytofirmans PsJN [T]	0.99337	0.99345	0.9911	*	0.98518	0.98735	0.98319	0.98504	0.97142	0.97794	0.98189	0.98513	0.98508	0.96743	0.99505
Paraburkholderia fungorum NBRC 102489 [T]	0.9846	0.98574	0.98532	0.98518	*	0.97757	0.99879	0.99506	0.96121	0.97181	0.9933	0.96696	0.96689	0.95659	0.98371
Paraburkholderia bryophila LMG 23644 [T]	0.98389	0.98356	0.97894	0.98735	0.97757	*	0.97469	0.97559	0.94475	0.95004	0.96949	0.97247	0.97238	0.94273	0.98445
Paraburkholderia insulsa LMG 28183 [T]	0.98245	0.98382	0.9841	0.98319	0.99879	0.97469	*	0.99525	0.96083	0.97214	0.99447	0.96596	0.96591	0.95583	0.98284
Burkholderia sp. ST111	0.98058	0.98171	0.98038	0.98504	0.99506	0.97559	0.99525	*	0.95523	0.96888	0.99858	0.96524	0.96517	0.95008	0.98056
Paraburkholderia kirstenboschensis KB15 [T]	0.97692	0.9773	0.97807	0.97142	0.96121	0.94475	0.96083	0.95523	*	0.99175	0.95528	0.9616	0.96167	0.99712	0.97188
Paraburkholderia rhynchosiae WSM 3937 [T]	0.97681	0.97788	0.9792	0.97794	0.97181	0.95004	0.97214	0.96888	0.99175	*	0.96966	0.97113	0.97121	0.98903	0.97461
Paraburkholderia aspalathi LMG 27731 [T]	0.97671	0.97833	0.97737	0.98189	0.9933	0.96949	0.99447	0.99858	0.95528	0.96966	*	0.96117	0.96112	0.94917	0.97726
Paraburkholderia sediminicola LMG 24238 [T]	0.97646	0.97725	0.97618	0.98513	0.96696	0.97247	0.96596	0.96524	0.9616	0.97113	0.96117	*	1	0.95765	0.98371
Paraburkholderia terricola LMG 20594 [T]	0.97643	0.97722	0.97618	0.98508	0.96689	0.97238	0.96591	0.96517	0.96167	0.97121	0.96112	1	*	0.95773	0.98369
Paraburkholderia caledonica NBRC 102488 [T]	0.9749	0.97478	0.97481	0.96743	0.95659	0.94273	0.95583	0.95008	0.99712	0.98903	0.94917	0.95765	0.95773	*	0.96779
Parburkholderia aromaticivorans BN5 [T]	0.99501	0.99537	0.99532	0.99505	0.98371	0.98445	0.98284	0.98056	0.97188	0.97461	0.97726	0.98371	0.98369	0.96779	*

## Sheet: ANIb_Msb3_only
Table 1 | ANIb values and percentage of aligned sequences between selected genomes and the genome strain Msb3
	x to strain Msb3	Strain Msb3 to x
Burkholderia sp. Ch1-1	98.59 [84.07]	98.89 [87.49]
Paraburkholderia xenovorans LB400 [T]	92.23 [71.01]	93.54 [78.62]
Paraburkholderia aromaticivorans BN5 [T]	89.03 [67.35]	89.29 [71.24]
Paraburkholderia phytofirmans PsJN [T]	86.85 [65.82]	87.07 [64.36]
Paraburkholderia terricola LMG 20594 [T]	84.71 [58.16]	84.01 [53.56]
Paraburkholderia sediminicola LMG 24238 [T]	84.61 [58.38]	84.01 [53.52]
Paraburkholderia bryophila LMG 23644 [T]	84.17 [57.87]	83.98 [56.44]
Paraburkholderia fungorum NBRC 102489 [T]	83.36 [55.39]	83.57 [57.28]
Burkholderia sp. ST111	83.31 [56.58]	83.98 [57.89]
Paraburkholderia aspalathi LMG 27731 [T]	83.10 [52.58]	84.15 [59.71]
Paraburkholderia insulsa LMG 28183 [T]	82.86 [52.46]	83.39 [59.23]
Paraburkholderia rhynchosiae WSM 3937 [T]	82.60 [53.69]	82.57 [52.28]
Paraburkholderia caledonica NBRC 102488 [T]	82.09 [58.91]	81.92 [52.90]
Paraburkholderia kirstenboschensis KB15 [T]	81.94 [53.94]	82.24 [51.56]
